# Supplementary material
Source: publisher site journal article supplement (https://www.dovepress.com/article/346242)
Supplement: Supplementary file 1 [file get_supplementary_file.php]

**Imaging study on acupuncture inhibiting** **inflammation and bone destruction in** **knee osteoarthritis induced by monosodium iodoacetate in rat model**

Supplemental Table S1 Grading criteria of Mankin score

| Structure | |
| --- | --- |
| 0 | Smooth intact surface |
| 1 | Slight surface irregularities |
| 2 | Pannus/surface fibrillation |
| 3 | Clefts into the transitional zone |
| 4 | Clefts into the radial zone |
| 5 | Clefts into the calcified zone |
| 6 | Total disorganization |
| Cells | |
| 0 | Uniform cell distribution |
| 1 | Diffuse cell proliferation |
| 2 | Cell clustering |
| 3 | Cell loss |
| Tidemark integrity | |
| 0 | Intact |
| 1 | Vascularity |

**Notes:** Adapted from Sahin K, Kucuk O, Orhan C, et al. Niacinamide and undenatured type II collagen modulates the inflammatory response in rats with monoiodoacetate-induced osteoarthritis. *Sci Rep*. 2021;11(1):14724.29

Supplemental Table S2 Grading criteria of synovitis score

| Enlargement of the synovial lining cell layer | |
| --- | --- |
| 0 | The lining cells form one layer |
| 1 | The lining cells form2–3 layers |
| 2 | The lining cells form 4–5 layers, few multinucleated cells might occur |
| 3 | The lining cells form more than 5 layers, the lining might be ulcerated and multinucleated cells might occur |
| Density of the resident cells | |
| 0 | The synovial stroma shows normal cellularity |
| 1 | The cellularity is slightly increased |
| 2 | The cellularity is moderately increased, multinucleated cells might occur |
| 3 | The cellularity is greatly increased, multinucleated giant cells, pannus formation and rheumatoid granulomas might occur |
| Inflammatory infiltrate | |
| 0 | No inflammatory infiltrate |
| 1 | Few mostly perivascular situated lymphocytes or plasma cells |
| 2 | Numerous lymphocytes or plasma cells, sometimes forming follicle-like aggregates |
| 3 | Dense band-like inflammatory infiltrate or numerous large follicle-like aggregates |

**Notes:** Adapted from Krenn V, Morawietz L, Burmester GR, et al. Synovitis score: discrimination between chronic low-grade and high-grade synovitis. *Histopathology*. 2006;49(4):358–364.30 ©2006 The Authors. Journal compilation 2006 Blackwell Publishing Limited.
